# Supplementary material for: HIV-1 elite controllers present a high frequency of activated regulatory T and Th17 cells
Source: PLoS One. 2020 Feb 5;15(2):e0228745. doi: 10.1371/journal.pone.0228745 (PMC7001932; doi:10.1371/journal.pone.0228745)
Supplement: S1 Table — (XLSX) [file pone.0228745.s002.xlsx]

## Sheet: Raw Data
Group	Clinical Data					Activation		T-CD4+ Subsets						T-CD8+ Subsets						Th17 and Treg Subsets
HIV-neg	Sex	Age	Years since HIV-1 diagnosis	Plasmatic Viral load (copies/ml)	CD4+ T cells count (cells/mm3)	CD4+CD38+HLA-DR+	CD8+CD38+HLA-DR+	TN %	TSCM %	TCM %	TTM%	TEM %	TEFF %	TN %	TSCM %	TCM %	TTM%	TEM %	TEFF %	Th17 %	Treg Total %	Activated Treg %	Resting Treg %	Non-Suppressive Treg %	Th17/Treg Ratio
N01	male	49.5096	NA	NA	909	0.3	0.86	30.2	0.084	44.4	4.97	9.71	0.25	17.3	0.22	3.49	10.5	35.4	23.3	0.95	5.02	22.7	5.03	72	0.1892
N02	female	44.0493	NA	NA	909	1	0.69	33.6	0.036	49.6	4	6	0.17	30.9	0.12	12.5	1.94	25.1	19.6	1.39	2.99	19.7	6.75	73.1	0.4649
N03	male	49.0548	NA	NA	776	0.55	0.85	20	0.37	62.6	1.54	5.49	0.21	37	2	22.4	6.37	0.069	10.4	1.59	5.96	22	1.72	73.7	0.2668
N04	female	49.6904	NA	NA	1768	0.56	0.64	27.9	0.27	56.7	1.83	5.77	0.39	59.9	1.22	9.91	7.34	0.03	2.65	3.35	3.62	20.5	7.11	70.3	0.9254
N05	female	56.8438	NA	NA	1519	0.52	0.46	35.5	0.2	56.9	2.21	1.79	0.06	42.5	1.06	25	9.41	0.13	1.51	0.44	5.85	12.9	7.6	78.3	0.0752
N06	female	30.7808	NA	NA	623	0.7	0.43	20.2	0.12	62.1	3.55	3.9	0.29	42.2	1.68	12.2	28.5	0.051	4.21	2.34	4.37	8.95	27.6	63.7	0.5355
N07	male	25.3151	NA	NA	984	0.5	0.44	37.7	0.28	50.5	2.79	2.84	0.23	45.5	1.3	13.3	5.26	0.089	6.48	1.06	3.86	5.95	30.3	63.1	0.2746
N08	female	20.6055	NA	NA	777	1.5	2.79	37.6	0.024	47.6	3.06	2.92	0.066	69.3	0.27	2.22	11.9	2.66	1.31	1.39	3.84	7.58	19.2	73.2	0.362
N09	female	34.1178	NA	NA	1372	0.44	0.54	23.5	0.063	39.5	8.65	11.2	5.11	35.5	0.21	3.32	6.96	4.93	19.4	0.7	5.4	12.8	17.9	67.9	0.1296
N10	male	63.0685	NA	NA	808	0.95	1.08	58.9	0.018	32.6	2.07	1.55	0.43	48.1	0.04	1.32	4.72	20.9	17.3	1.12	4.28	12.3	23.7	63.8	0.2617
N11	male	46.8329	NA	NA	1178	0.62	1.58	28.1	0.12	60	3.88	5.48	0.45	43.1	0.15	1.19	3.88	0.14	15	1	3.1	14	24.9	60.6	0.3226
N12	female	34.3397	NA	NA	751	0.88	1.82	8.68	0.012	49.5	13.7	20.2	0.065	8.07	0.11	0.6	13.7	20.6	7.62	0.94	4.5	19.9	13.1	66.7	0.2089
N13	male	21.3479	NA	NA	665	0.86	1.66	29.9	0.035	56.8	7.37	3.63	0.047	63.8	0.049	0.69	7.37	3.14	1.43	1.27	4.03	9.73	43.7	44.5	0.3151
N14	male	34.3753	NA	NA	714	1.5	2.79	26.3	0.16	56.6	9.29	3.98	0.57	16.6	0.049	0.34	9.29	13.6	24.4	0.43	3.65	16	31.8	51.6	0.1178
N15	male	34.526	NA	NA	854	1.17	2.99	12.2	0.13	40.8	9.43	31.2	2.35	19.5	0.072	0.3	9.43	20.2	37.1	0.96	3.53	6.61	34.9	58.2	0.272
N16	female	26.7562	NA	NA	701	2.44	2.02	11.6	0.078	50.6	20.1	13.6	0.087	24.5	0.054	35.1	15.7	17.8	2.59	1.44	4.99	2.81	42.6	53.7	0.2886
N17	male	50.3123	NA	NA	2308	0.87	1.18	1.84	0.046	41	12.7	40.2	1.27	2.74	0.04	16.8	36.1	39.5	2.48	0.65	3.06	5.02	20.7	71.6	0.2124
N18	female	39.6466	NA	NA	784	1.79	3.08	14.6	0.2	73.5	9.17	1.58	0.043	22.5	0.18	38.8	24.9	7.49	1.57	0.43	3.02	3.05	43.4	51.8	0.1424
cART	Sex	Age	Years since HIV-1 diagnosis	Plasmatic Viral load (copies/ml)	CD4+ T cells count (cells/mm3)	CD4+CD38+HLA-DR+	CD8+CD38+HLA-DR+	TN %	TSCM %	TCM %	TTM%	TEM %	TEFF %	TN %	TSCM %	TCM %	TTM%	TEM %	TEFF %	Th17 %	Treg Total %	Activated Treg %	Resting Treg %	Non-Suppressive Treg %	Th17/Treg Ratio
H01	male	51.0986	30.7068	49	902	1.21	1.78	32	0.14	54.3	1.39	4.07	0.12	21.6	0.41	21.6	1.07	26.1	19.1	0.94	3.85	28	3.76	66.9	0.2442
H02	female	32.4247	11.8521	49	1294	1.21	1	36.6	0.14	51.4	1.9	4.15	0.08	38.9	0.82	8.05	0.35	22.1	20.2	0.65	3.72	11.2	13.8	75.6	0.1747
H03	male	42.7507	8.36438	49	1118	1.91	2.11	59.6	0.036	36.5	0.4	0.86	0.068	59	0.52	3.83	17	10.5	3.34	0.25	3.39	38.8	8.86	48.6	0.0737
H04	female	47.5671	7.86027	49	760	1.95	4.17	43.1	0.077	51	0.91	1.19	0.045	46.3	0.62	2.29	12.4	4.89	18.9	0.26	3.92	15.8	8.01	73.5	0.0663
H05	male	41.2986	9.15068	49	768	2.09	2.25	67.3	0.06	27.9	1	0.54	0.1	68.6	0.26	0.71	4.41	5.3	8.56	0.67	2.7	6.27	50.3	35.9	0.2481
H06	male	50.2384	8.65205	49	941	2.45	2.72	48	0.45	40.9	1.95	3.13	0.24	44.2	0.25	4.7	5.75	10.3	27.4	0.87	3.82	4.55	22.3	73.3	0.2277
H07	male	45.7452	9.61096	49	494	1.28	3.36	42.9	0.36	42	4.37	4	0.5	43.1	0.24	5.4	12.2	4.69	19.6	1.34	3.2	15.9	13.1	70.7	0.4188
H08	male	49.5616	12.1589	49	907	3.27	2.16	45.9	0.45	41.6	3.28	3.39	0.14	36.9	0.54	4.52	14.8	8.46	14.6	0.83	6.25	15	9.64	74.3	0.1328
H09	female	26.9288	10	49	1052	0.71	2.42	33.8	0.1	57	1.03	1.57	0.059	50.3	0.057	13.4	6.91	13.3	8.5	1.07	5.12	13.3	9.12	76.3	0.209
H10	male	49.9671	8.59726	49	651	4.28	7.68	58.5	4.83	13.9	0.14	1.83	4.73	9.53	0.76	0.49	0.27	0.51	75.2	0.49	6.74	10.2	13.2	76.2	0.0727
H11	female	42.6521	8.68219	49	700	1.38	3.49	20.2	0.12	55.1	6.41	10.4	0.079	23.9	0.17	1.12	6.41	20.5	12	1.59	2.62	15.7	9.09	73.8	0.6069
H12	female	47.0822	14.3096	49	809	1.09	1.98	28.7	0.31	47.6	8.22	11.8	0.055	57.5	0.13	0.5	8.22	0.19	0.4	1.71	2.79	22.7	8.1	67.4	0.6129
H13	male	39.6384	9.69863	49	794	1.42	3.54	19.5	0.25	40.5	7.5	25.6	0.75	17.1	0.3	0.32	7.5	15.5	25.2	1.77	2.04	10.1	35.3	54.6	0.8676
H14	male	57.2301	11.9699	49	830	0.89	3.63	17.6	0.3	59.4	7.06	11.9	0.077	8.05	0.077	0.45	7.06	2.54	19.7	1.62	3.39	16.6	9.37	71.4	0.4779
H15	male	65.3479	23.4849	49	876	1.66	3.48	17	0.52	66	4.7	8.35	0.067	16.6	0.34	1.15	4.7	34.2	17.2	0.83	3.75	17.1	15.1	67.3	0.2213
H16	female	34.2603	17.7178	49	648	3.02	3.09	14.4	0.27	58.7	15.6	8.63	0.089	23.9	0.071	42.6	20	10.5	0.56	1.06	4.02	3.48	41.9	52.6	0.2637
H17	female	42.4685	13.8438	49	1034	2.21	3.6	8.95	0.18	62.7	17.1	7.91	0.06	18.1	0.076	31.4	33.3	13.7	0.95	1.88	3.4	3.81	25.6	68.8	0.5529
H18	male	22.2466	17.7178	49	997	1.3	0.8	11.3	0.066	37	23.3	17.4	3	9.13	0.079	35.5	31.9	15.1	0.32	0.65	5.98	1.28	39.3	59.1	0.1087
EC	Sex	Age	Years since HIV-1 diagnosis	Plasmatic Viral load (copies/ml)	CD4+ T cells count (cells/mm3)	CD4+CD38+HLA-DR+	CD8+CD38+HLA-DR+	TN %	TSCM %	TCM %	TTM%	TEM %	TEFF %	TN %	TSCM %	TCM %	TTM%	TEM %	TEFF %	Th17 %	Treg Total %	Activated Treg %	Resting Treg %	Non-Suppressive Treg %	Th17/Treg Ratio
EC02	female	48.9945	15.3014	49	1406	0.93	3.33	56.1	0.25	33	2.6	0.91	0.16	48.2	1.23	17.2	1.16	9.94	8.17	0.9	2.47	21.9	8.04	68.7	0.3644
EC52	female	40.6603	15.7534	49	1564	0.85	1.31	43.3	0.083	43.1	3.04	3.48	0.75	45.4	1.35	20.6	0.72	5.43	10.6	1.56	2.81	17.2	7.75	75.8	0.5552
EC26	male	41.0274	5.05479	49	1687	1.06	1.11	36.1	0.034	44.2	4.52	4.6	1.07	43.7	1.32	16.6	0.86	3.99	14.5	0.84	3.98	26.7	9.77	62.2	0.2111
EC30	male	30.9342	4.2274	49	667	0.54	0.43	27	0.057	48.8	2.93	14.5	1.32	34.8	1.01	11.6	19	0.21	10.3	2.14	3.32	21.2	17.7	60.6	0.6446
EC35	female	34.5014	3.54795	49	885	0.23	1.06	43.6	0.12	40	4.96	4.56	0.53	18.8	0.87	7.42	19.3	7.58	24.9	1.38	2.98	29	8.03	62.2	0.4631
EC38	female	37.6959	2.58904	49	1303	0.7	6.36	32	0.081	52.8	1.16	4.6	0.73	26.7	0.076	10.7	9.57	21.6	23.7	1.71	3.5	24	6.97	67.3	0.4886
EC39	female	69.5808	2.94247	49	1002	1.5	7.88	40.2	0.1	40.5	0.52	9.53	1.85	8.6	0.052	7.41	7.75	37.6	31.4	1.13	4.57	9.05	16.8	73.5	0.2473
EC07	female	28.8849	9.90411	257	1460	1.57	3.78	60.9	0.23	24	1.2	2.4	1.37	28.9	1.42	16.7	2.33	13.5	22	5.41	1.97	13	15.4	71.1	2.7462
EC11	female	44.5753	16.8356	49	1027	1.08	1.41	11.2	0.1	72.2	4.18	2.53	0.027	13.9	1.1	35.4	1.84	14.6	17.6	2.51	2.87	26.3	2.69	70.3	0.8746
EC42	female	57.2603	20.0466	84	1025	0.94	1.8	32.6	0.048	49.7	3.95	4.75	0.38	18.9	0.17	18.6	1.31	25.5	25.6	1.16	2.53	22.6	3.68	73.5	0.4585
EC17	female	63.4137	12.4466	96	2697	0.71	1.41	36.5	0.14	43.6	3.99	13.8	0.24	23.5	1.15	17.8	0.21	34.5	0.24	2.43	3.14	34.1	3.47	59.7	0.7739
EC18	female	77.3836	9.32329	49	717	0.68	2.15	25.7	0.38	50	2.61	8.61	1.45	29	7.76	21.3	8.79	0.024	14.8	1.31	3.15	27.1	4.89	67.2	0.4159
EC19	male	45.6301	7.66575	49	889	0.48	0.75	16.1	0.15	68.8	2.83	4.74	0.38	23.9	3.72	28.9	17.4	0.0082	8.56	3.55	3.18	9.9	9.65	79	1.1164
EC36	female	38.8137	5.33151	1086	1375	0.7	0.47	27.9	0.15	62.4	2.12	2.87	0.12	35.9	5.05	7.75	20.4	0.18	11.3	0.87	3.13	7.83	20.6	71.5	0.278
VC	Sex	Age	Years since HIV-1 diagnosis	Plasmatic Viral load (copies/ml)	CD4+ T cells count (cells/mm3)	CD4+CD38+HLA-DR+	CD8+CD38+HLA-DR+	TN %	TSCM %	TCM %	TTM%	TEM %	TEFF %	TN %	TSCM %	TCM %	TTM%	TEM %	TEFF %	Th17 %	Treg Total %	Activated Treg %	Resting Treg %	Non-Suppressive Treg %	Th17/Treg Ratio
VC06	male	49.3041	21.8411	2949	1414	5.84	17.2	36.1	0.068	39.9	1.17	9.06	0.43	33.7	0.97	1.96	11.8	13.6	26.9	2.68	1.87	15.5	8.27	76.4	1.4332
VC09	male	36.6548	15.1589	428	1303	0.63	1.76	37.6	0.24	53	1.18	1.98	0.22	42.9	2.56	11.5	8.09	0.057	11	1.45	3.72	16.1	4.38	78.9	0.3898
VC10	male	45.9123	13.9068	775	1381	2.96	14.4	43.8	0.076	28.1	1.72	9.19	4.87	10.2	0.42	1.03	10.7	28.4	42.1	1.7	2.68	18.8	11.6	69.2	0.6343
VC14	female	41.4164	12.063	222	688	2.73	10.3	43.4	0.043	42.4	3.22	2.48	0.65	39	0.78	1.32	11.6	2.43	17.2	2.5	4.16	28.6	7.71	60.9	0.601
VC15	female	38.5315	11.4027	655	691	4.24	8.72	42.4	0.15	40.3	2.15	5.92	0.44	14.7	0.95	1.1	14.2	21.1	32.3	1.63	3.46	24.5	4.57	70.1	0.4711
VC16	male	45.9781	16.3288	1521	542	1.9	3.99	50.8	0.34	25.6	2.98	8.07	6.7	38.1	0.38	1.87	5.33	4.44	36.8	1.42	3	7.89	18.9	72.8	0.4733
VC23	male	42.6904	4.98904	988	573	3.21	7.36	33.9	0.93	40.4	3.07	9.41	0.46	38.5	0.63	4.09	14.5	12.6	17.5	1.44	3.28	14.7	10.2	73.7	0.439
VC31	female	34.8932	13.3041	587	511	3.03	5.85	13.2	0.18	62.2	9.68	13.2	0.14	5.36	0.079	11.9	15.7	58.9	4.8	3.8	2.83	14.3	14.7	69.6	1.3428
VC32	male	48.1425	6.02466	226	638	2.41	15.4	30	0.41	40.5	4.51	10.4	2.63	12.3	0.17	1.11	6.65	13.7	58.6	0.93	1.32	17.7	9.97	71.9	0.7045
VC34	male	35.2164	9.32329	216	1583	1.15	17.3	11	0.13	23.1	0.31	20.7	32	11.9	0.24	11.4	22.1	11.3	20.4	0.73	2.68	22.1	6.91	70.5	0.2724
VC41	male	51.9096	10.3644	164	1349	3.32	17	49.4	0.3	30.9	0.4	3.52	0.44	24.7	0.36	3.11	3.4	17.2	37.8	0.66	2.1	15.2	16.4	66.5	0.3143
VC43	female	42.9452	3.09315	333	896	2.63	12.7	35.4	0.22	42.7	0.42	6.1	2.35	20.1	0.2	5.22	5.29	26.9	34.9	1.4	2.23	8.99	29.8	60.7	0.6278
VC47	female	40.5288	5.76986	450	820	1.71	2.15	59.3	0.21	22.6	0.63	7.8	2.09	33.5	0.21	4.97	7.71	8.86	32.6	0.63	2.6	3.67	47.7	48.2	0.2423
